# Supplementary material for: Sociodemographic and Health Indicators of Diet Quality in Pre-Frail Older Adults in New Zealand
Source: Preprints.org preprint supplement (doi:10.20944/preprints202308.1443.v1), 2023-08-22
Supplement: Supplementary file 2 [file supplementary]

Article

Socio-demographic and health indicators of diet quality in pre-frail older adults in New Zealand

Esther Tay 1, Daniel Barnett 2, Maisie Rowland 3, Ngaire Kerse 1, Richard Edlin 5, Debra L. Waters 6,7,8, Martin Connolly 9, Avinesh Pillai 2, Evelingi Leilua 1, Ruth Teh 1*

Supplementary Material

**Materials and Methods**

**Figure S1** Summary of systems and changes implemented for cleaning Intake24 data.

**Table S1.** Multivariate regression against DQI-I score and subcomponents for Low Energy Reporter (LER) only.

| **Demographic and health variables** | **B** | **95% Wald CI** | ***p*-value** |
| --- | --- | --- | --- |
| **DQI-I total score** |  |  |  |
| (Intercept) | 58.567 | 52.248, 64.887 | *<0.001* |
| Live alone; (reference: with others) | 2.480 | -0.300, 5.260 | 0.080 |
| Alcohol consumption (never; reference: regular) | -2.382 | -5.921, 1.156 | 0.187 |
| (Occasional; reference: regular) | 0.680 | -2.404, 3.764 | 0.666 |
| Vision (impaired; reference: non impaired) | -3.890 | -9.254, 1.474 | 0.155 |
| Deprivation (low; reference: high) | 2.436 | -1.027, 5.898 | 0.168 |
| (Medium; reference: high) | 2.125 | -1.208, 5.457 | 0.211 |
| (Scale) | 68.016 | 54.281, 85.226 |  |
| **Variety score** |  |  |  |
| (Intercept) | 7.743 | 3.259, 12.227 | *<0.001* |
| Live alone; (reference: with others) | 0.987 | -0.086, 2.059 | 0.071 |
| Waist circumference, cm | 0.027 | -0.015, 0.069 | 0.207 |
| GDS score (no depression; reference: depression) | 0.894 | -0.473, 2.261 | 0.200 |
| (Scale) | 10.709 | 8.533, 13.438 |  |
| **Adequacy score** |  |  |  |
| (Intercept) | 16.864 | 10.581, 23.147 | *<0.001* |
| Deprivation (low; reference: high) | 1.499 | -0.344, 3.341 | 0.111 |
| (Medium; reference: high) | 2.489 | 0.689, 4.289 | *0.007* |
| Waist circumference, cm | 0.083 | 0.025, 0.141 | *0.005* |
| Alcohol consumption (never; reference: regular) | -0.920 | -2.854, 1.014 | 0.351 |
| (Occasional; reference: regular) | 0.022 | -1.626, 1.669 | 0.979 |
| (Scale) | 19.614 | 15.630, 24.615 |  |
| **Moderation score** |  |  |  |
| (Intercept) | 20.251 | 16.143, 24.359 | *<0.001* |
| Sex (male; reference: female) | -1.777 | -3.135, -0.419 | *0.010* |
| BMI, kg/m2 | -0.177 | -0.303, -0.051 | *0.006* |
| Live alone; (reference: with others) | 0.602 | -0.762, 1.966 | 0.387 |
| (Scale) | 15.798 | 12.598, 19.810 |  |
| **Balance score** |  |  |  |
| (Intercept) | 5.391 | 3.779, 7.004 | *<0.001* |
| Supplements (0; reference: 1+) | 0.514 | 0.028, 1.000 | *0.038* |
| BMI, kg/m2 | -0.031 | -0.078, 0.016 | 0.189 |
| Sex (male; reference: female) | 0.401 | -0.087, 0.889 | 0.107 |
| Education level (primary; reference: tertiary) | -0.989 | -2.500, 0.522 | 0.199 |
| (Secondary; reference: tertiary) | -0.097 | -0.584, 0.391 | 0.698 |
| (Scale) | 2.188 | 1.745, 2.744 |  |

Italicized *p*-values are significant at the 0.05 level.

**Table S2.** Multivariate regression against DQI-I score and subcomponents for plausible reporters only.

| **Demographic and health variables** | **B** | **95% Wald CI** | ***p*-value** |
| --- | --- | --- | --- |
| **DQI-I total score** |  |  |  |
| (Intercept) | 59.995 | 51.618, 68.372 | *<0.001* |
| Ethnic group (European; reference: non-European) | 3.034 | 0.016, 6.052 | *0.049* |
| Waist circumference, cm | -.039 | -0.113, 0.035 | 0.299 |
| Live alone; (reference: with others) | 0.807 | -0.936, 2.550 | 0.364 |
| Deprivation (low; reference: high) | 1.443 | -0.695, 3.581 | 0.186 |
| (Medium; reference: high) | 0.893 | -1.330, 3.116 | 0.431 |
| (Scale) | 59.223 | 50.634, 69.267 |  |
| **Variety score** |  |  |  |
| (Intercept) | 13.526 | 12.693, 14.360 | *<0.001* |
| Medications (1; reference: 2+) | 1.191 | -0.024, 2.406 | 0.055 |
| Sex (male; reference: female) | 0.491 | -0.192, 1.173 | 0.159 |
| Deprivation (low; reference: high) | 0.624 | -0.190, 1.437 | 0.133 |
| (Medium; reference: high) | 0.751 | -0.094, 1.596 | 0.082 |
| Alcohol consumption (never; reference: regular) | -0.682 | -1.557, 0.193 | 0.127 |
| (Occasional; reference: regular) | -0.278 | -1.041, 0.486 | 0.476 |
| (Scale) | 8.812 | 7.534, 10.306 |  |
| **Adequacy score** |  |  |  |
| (Intercept) | 21.257 | 16.126, 26.387 | *<0.001* |
| Ethnic group (European; reference: non-European) | 2.088 | 0.724, 3.453 | *0.003* |
| Smoking (non-smoker; reference: smoker) | 4.062 | 0.457, 7.666 | *0.027* |
| Education level (primary; reference: tertiary) | -1.833 | -4.165, 0.499 | 0.123 |
| (Secondary; reference: tertiary) | 0.079 | -0.750, 0.908 | 0.851 |
| NEADL score | 0.161 | -0.026, 0.348 | 0.091 |
| (Scale) | 13.025 | 11.136, 16.234 |  |
| **Moderation score** |  |  |  |
| (Intercept) | 14.275 | 8.80, 19.744 | *<0.001* |
| Live alone; (reference: with others) | 0.927 | 0.031, 1.823 | *0.043* |
| Age, (<80 years; reference: 80+ years) | -0.452 | -1.356, 0.452 | 0.327 |
| MoCA score (not impaired; reference: impaired) | 0.778 | -0.244, 1.799 | 0.136 |
| Waist circumference, cm | -0.048 | -0.084, -0.012 | *0.010* |
| NEADL score | 0.047 | -0.156, 0.250 | 0.647 |
| (Scale) | 14.938 | 12.771, 17.471 |  |
| **Balance score** |  |  |  |
| (Intercept) | 4.652 | 4.259, 5.046 | *<0.001* |
| Alcohol consumption (never; reference: regular) | 0.674 | 0.256, 1.092 | *0.002* |
| (Occasional; reference: regular) | 0.373 | 0.011, 0.734 | *0.043* |
| MoCA score (not impaired; reference: impaired) | -0.590 | -0.966, -0.214 | *0.002* |
| (Scale) | 2.040 | 1.744, 2.386 |  |

Italicized *p*-values are significant at the 0.05 level.

| All participants | | | |
| --- | --- | --- | --- |
| Variety  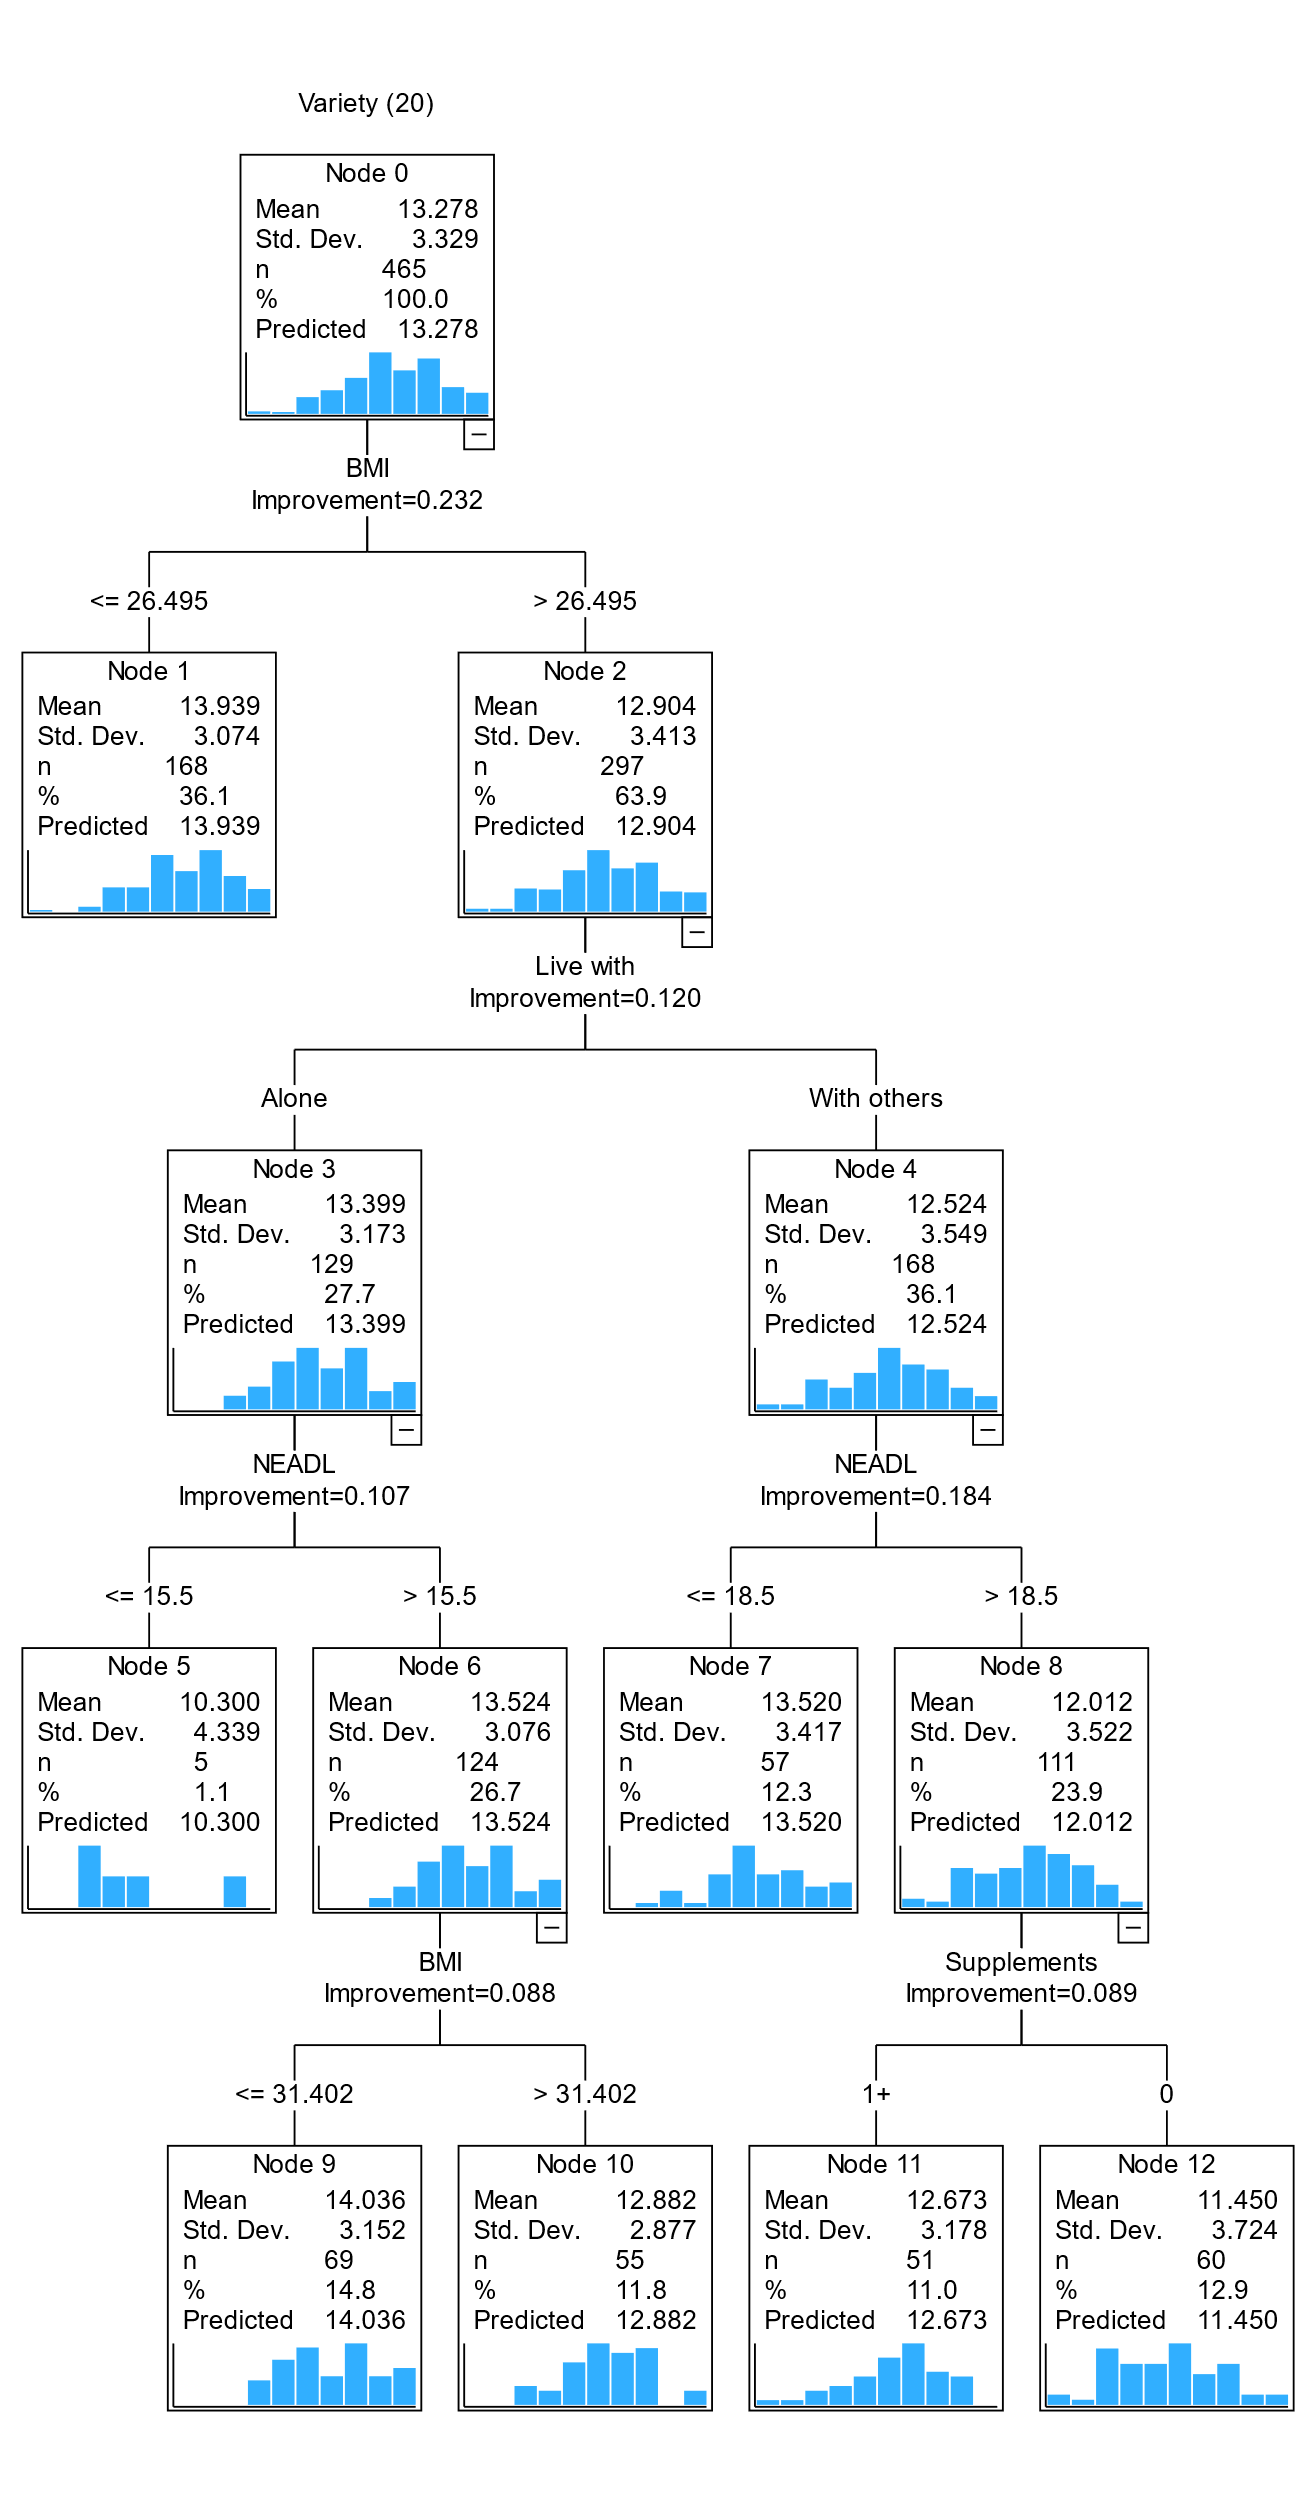 | Adequacy  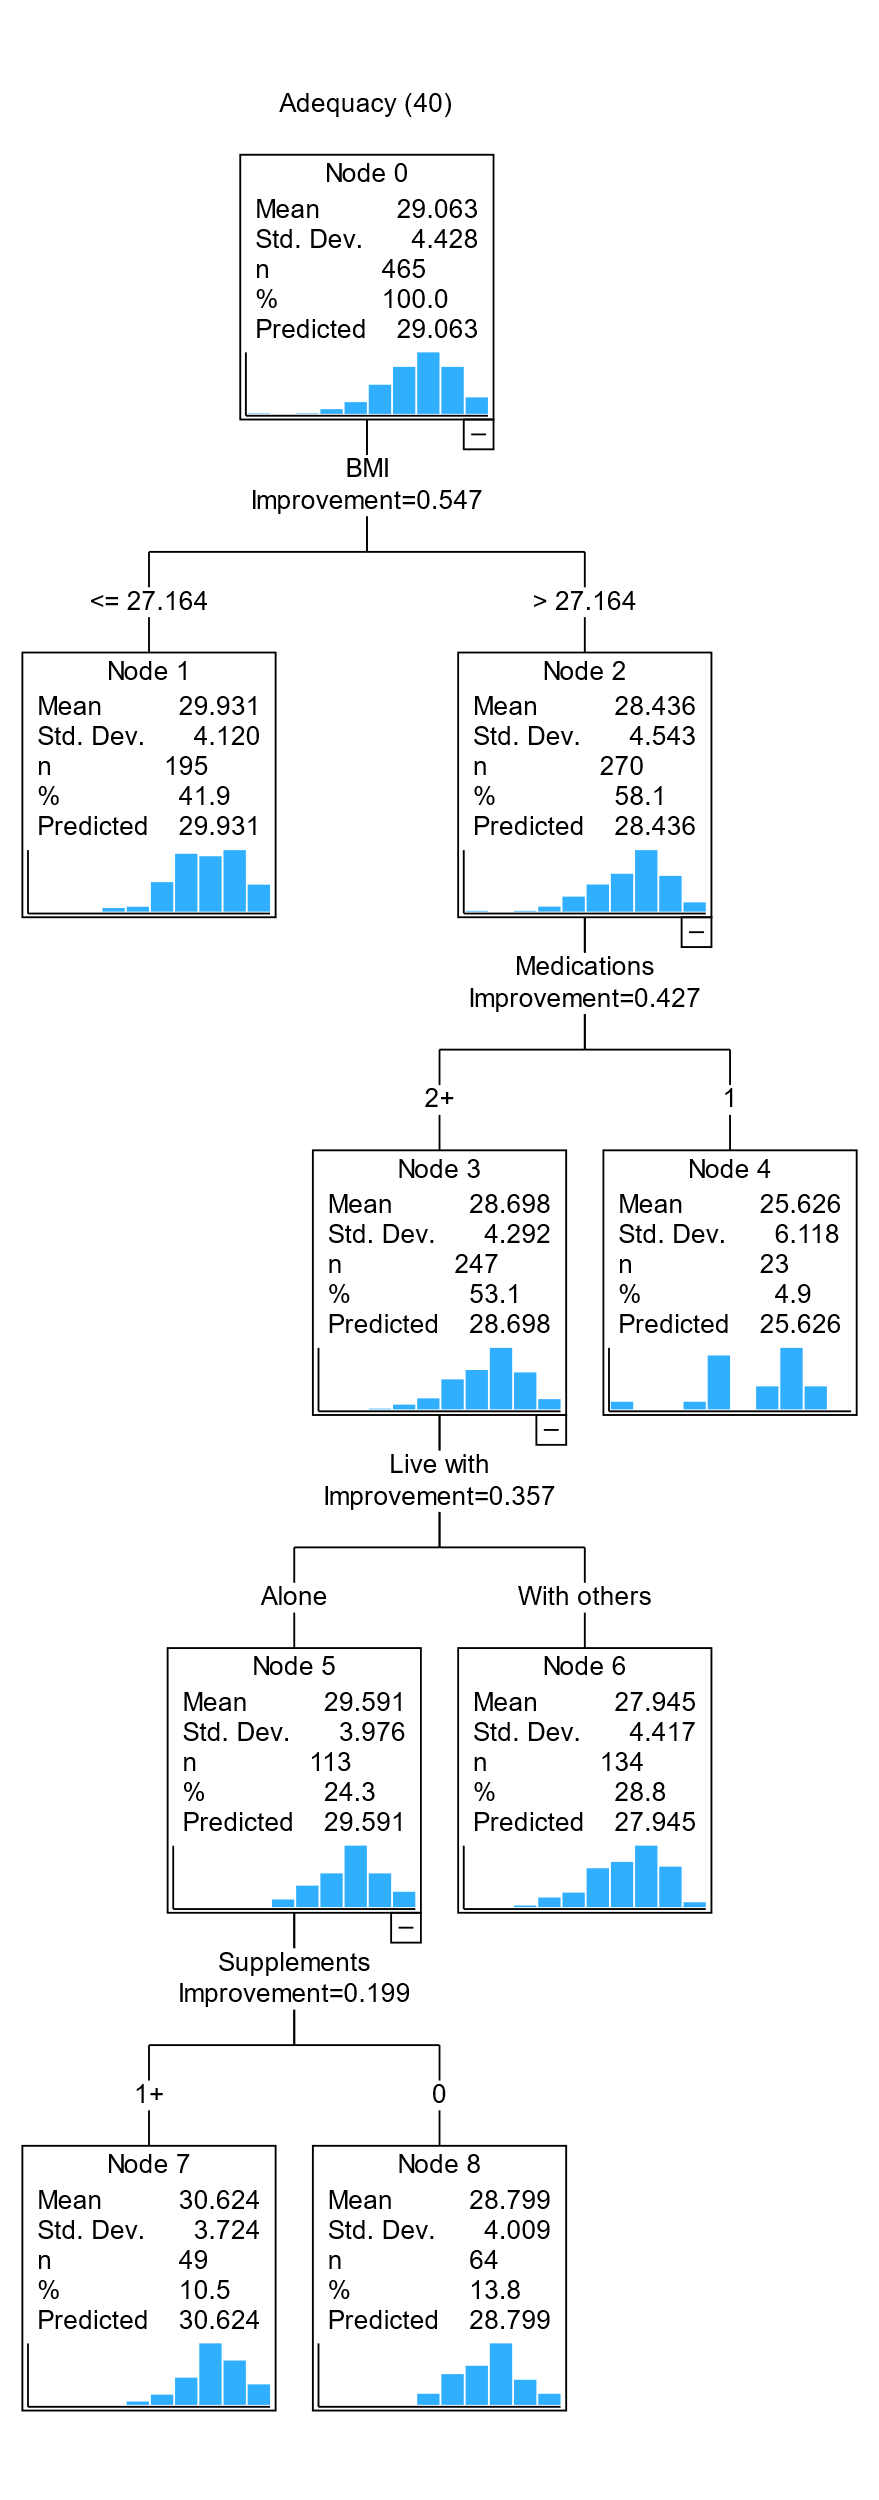 | Moderation  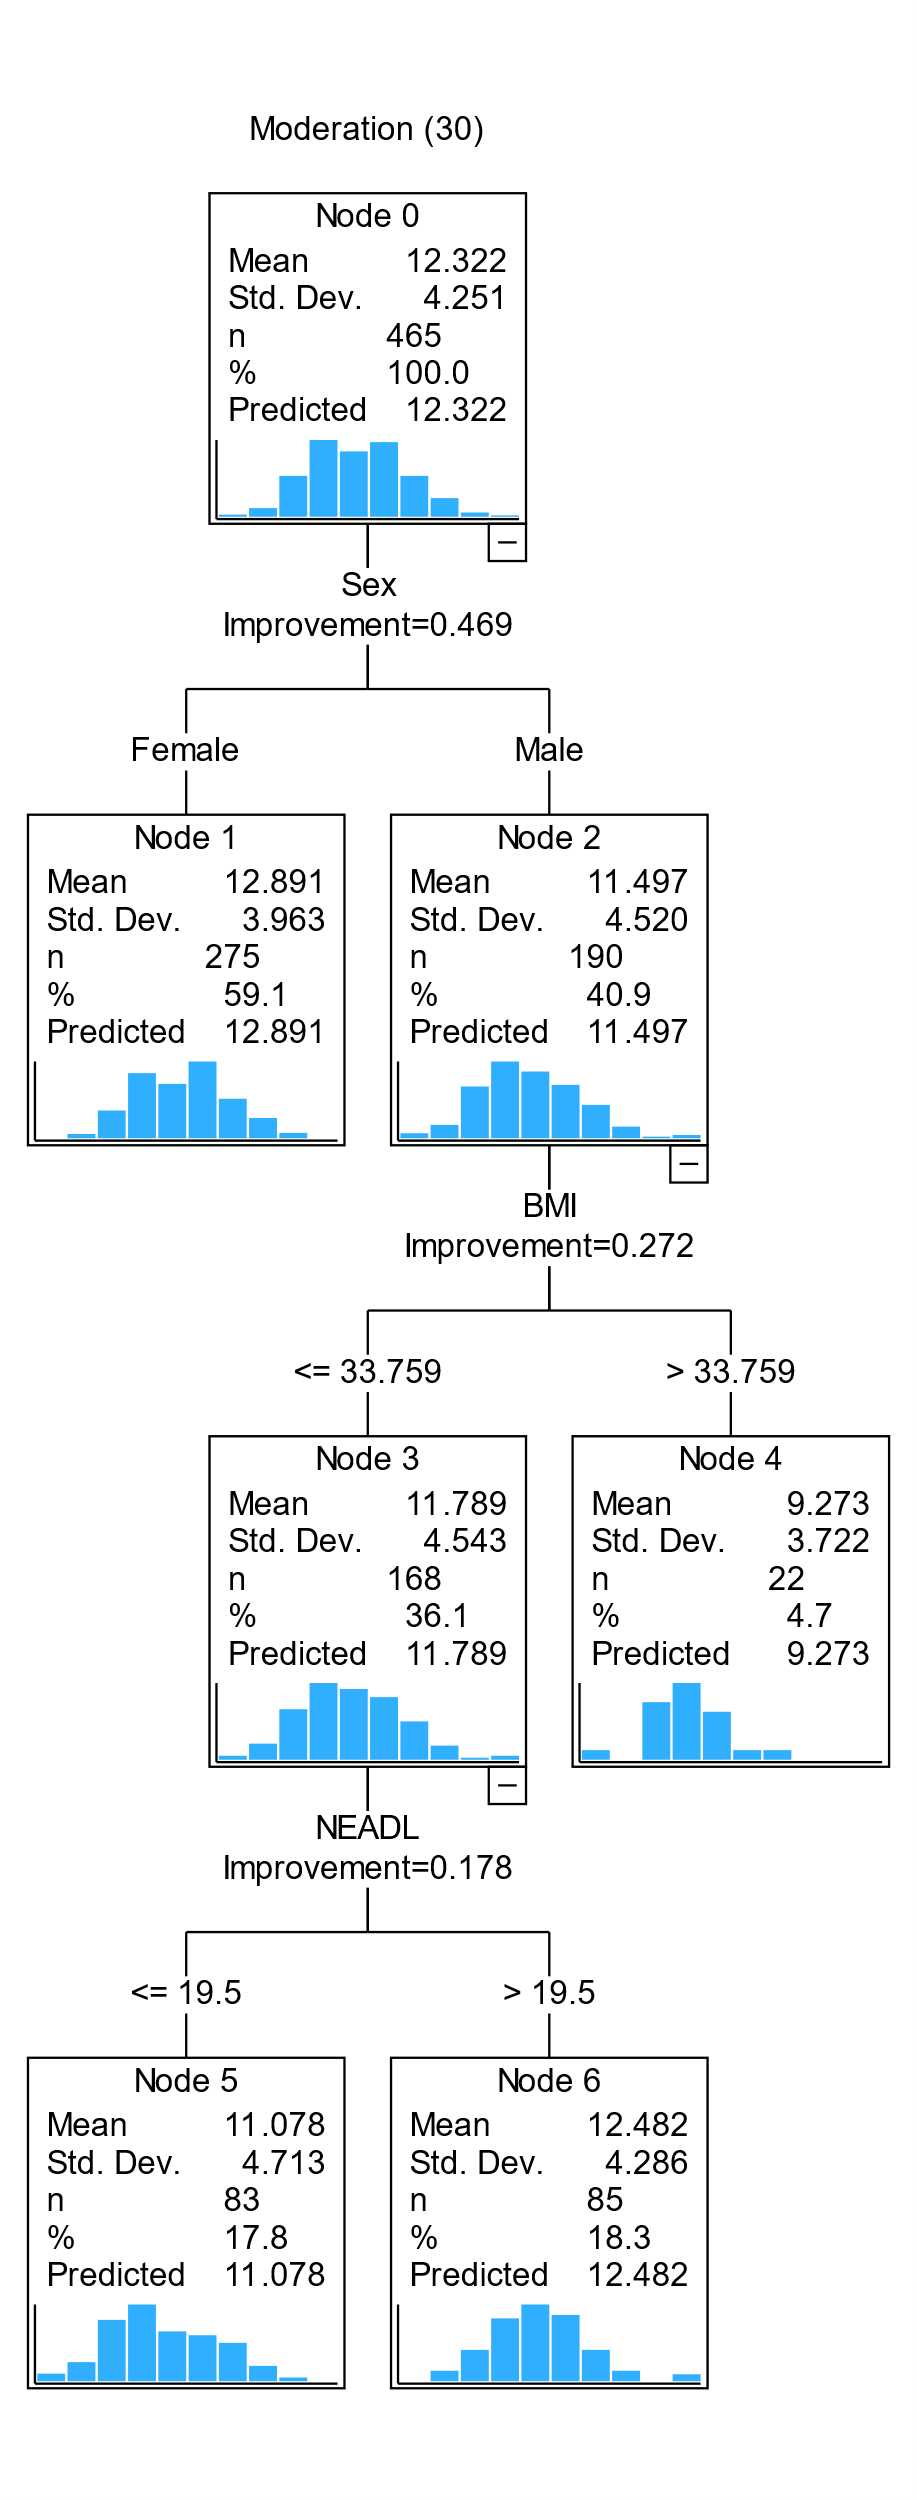 | Balance  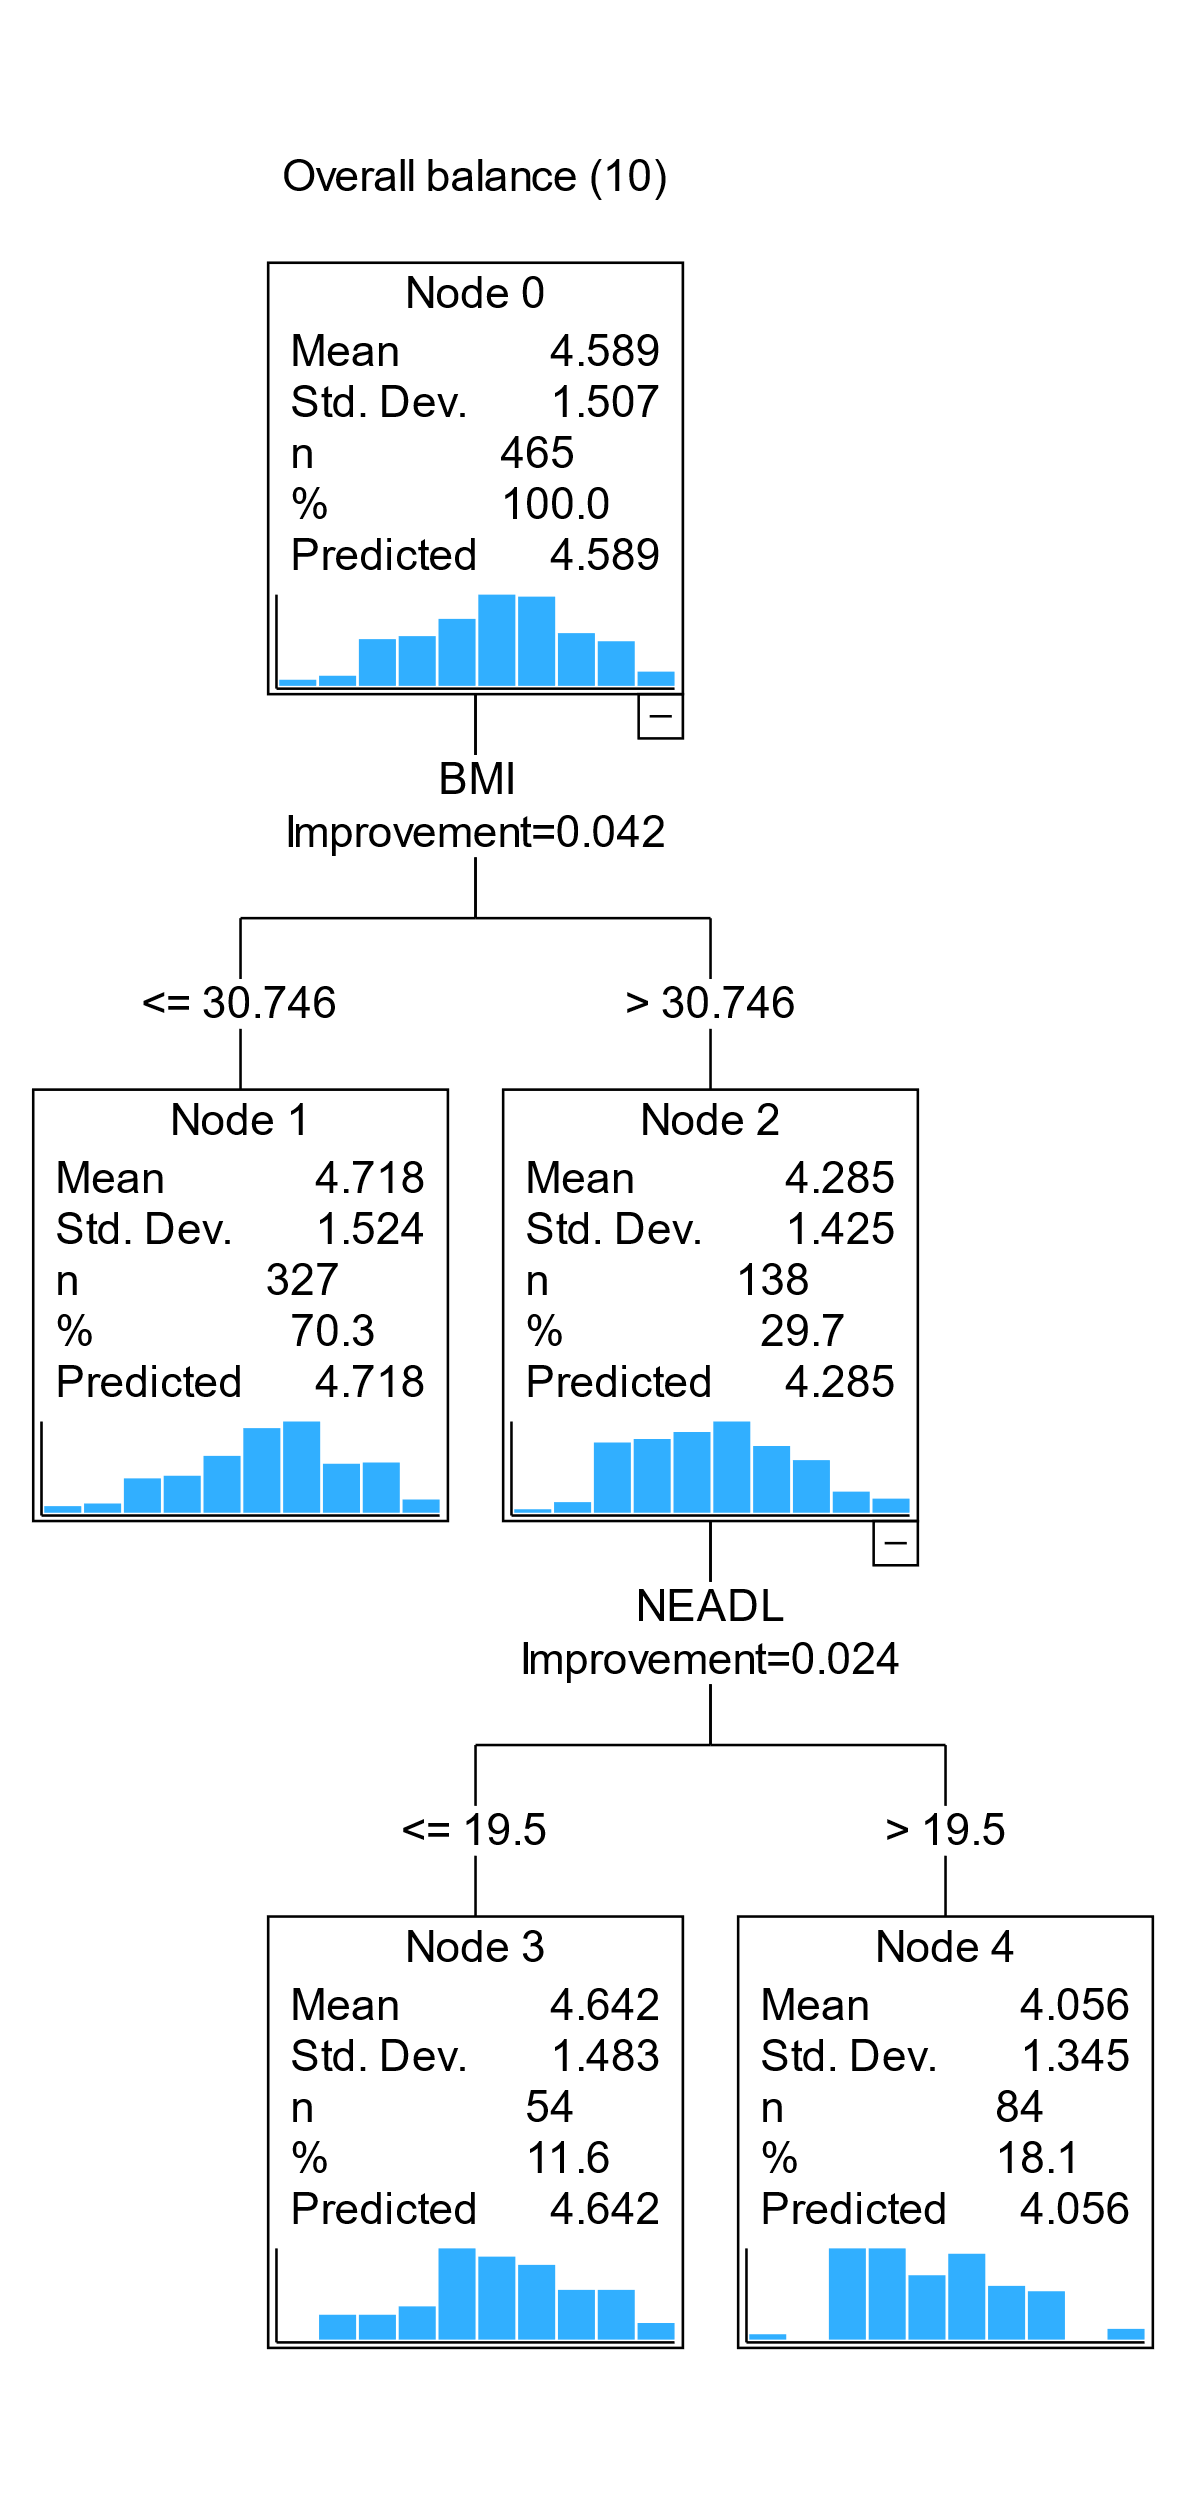 |

**Figure S2.** CART diagram of factors associated with DQI-I subcomponents in pre-frail older adults

| Plausible reporters only | | | | |
| --- | --- | --- | --- | --- |
| Total DQI-I  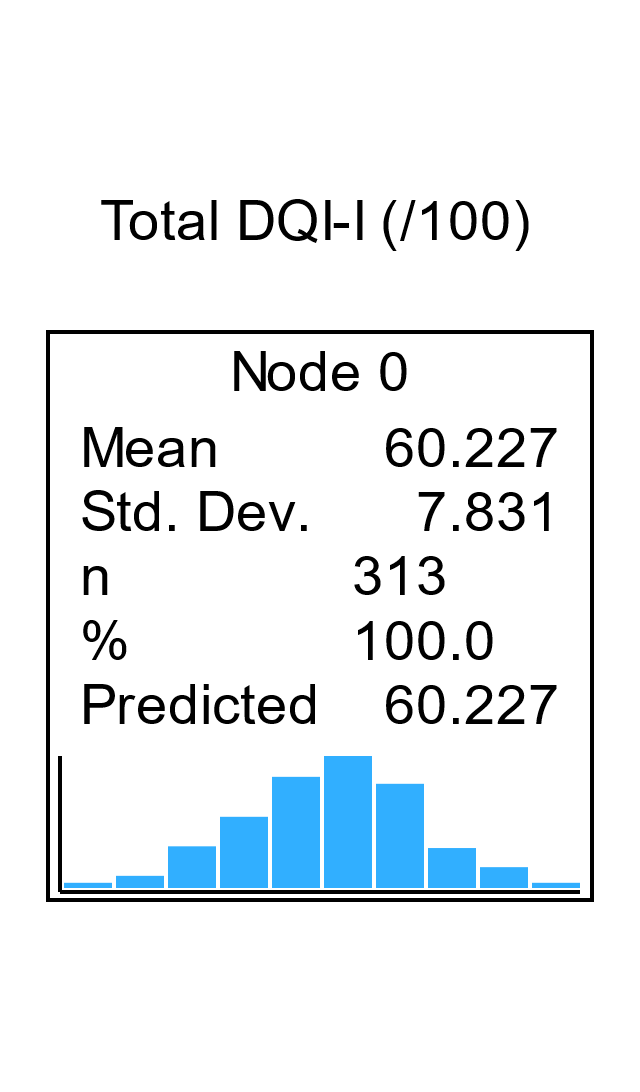 | Variety  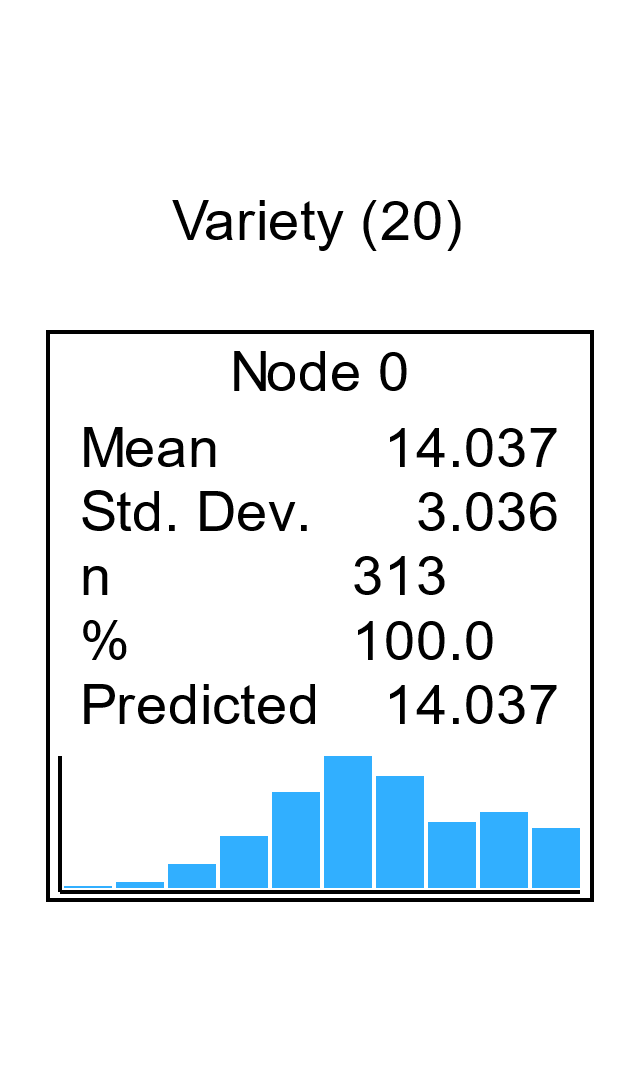 | Adequacy  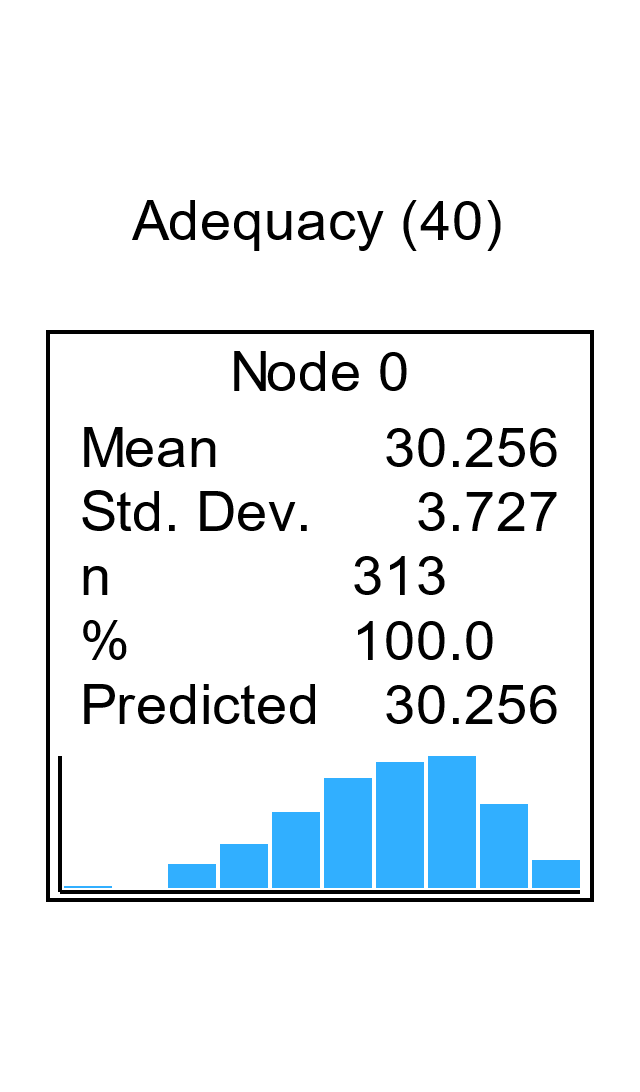 | Moderation  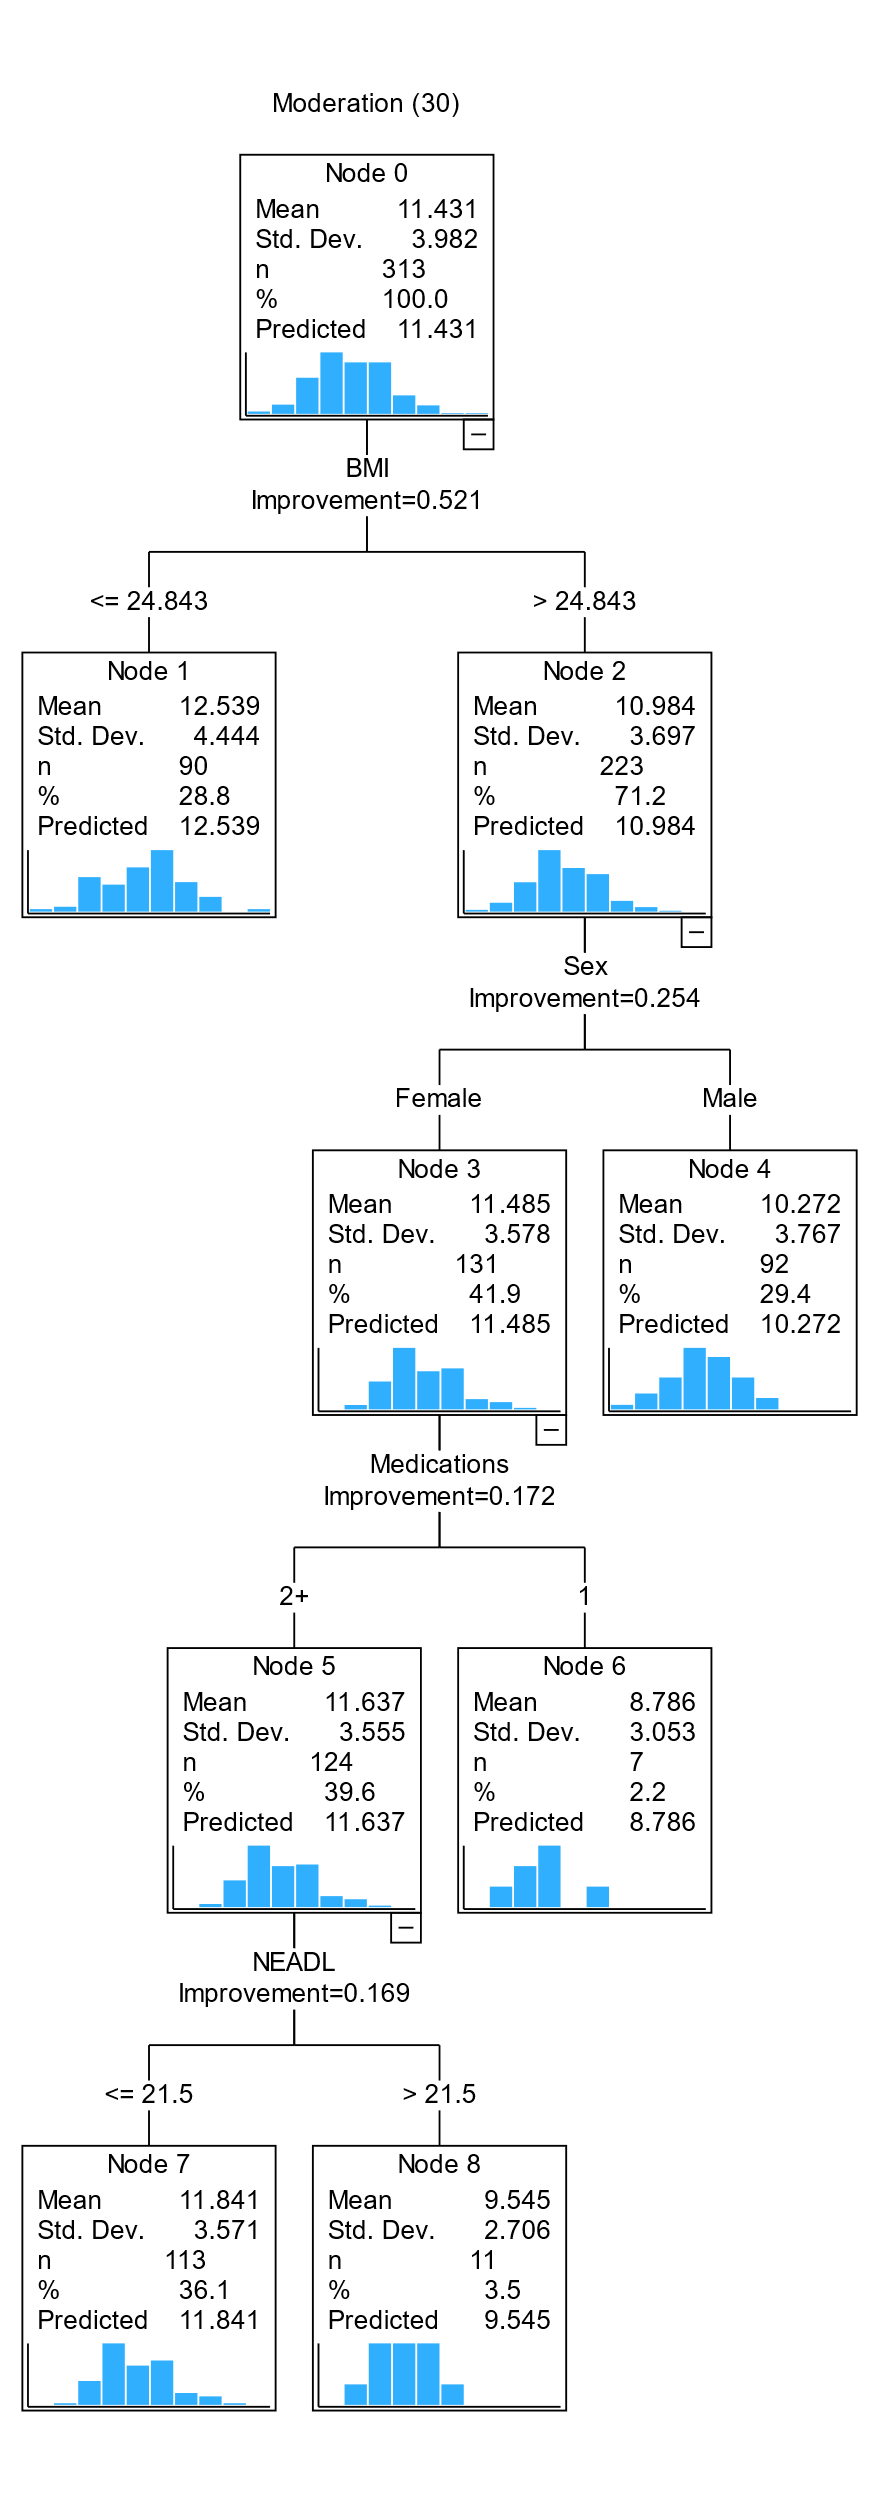 | Balance  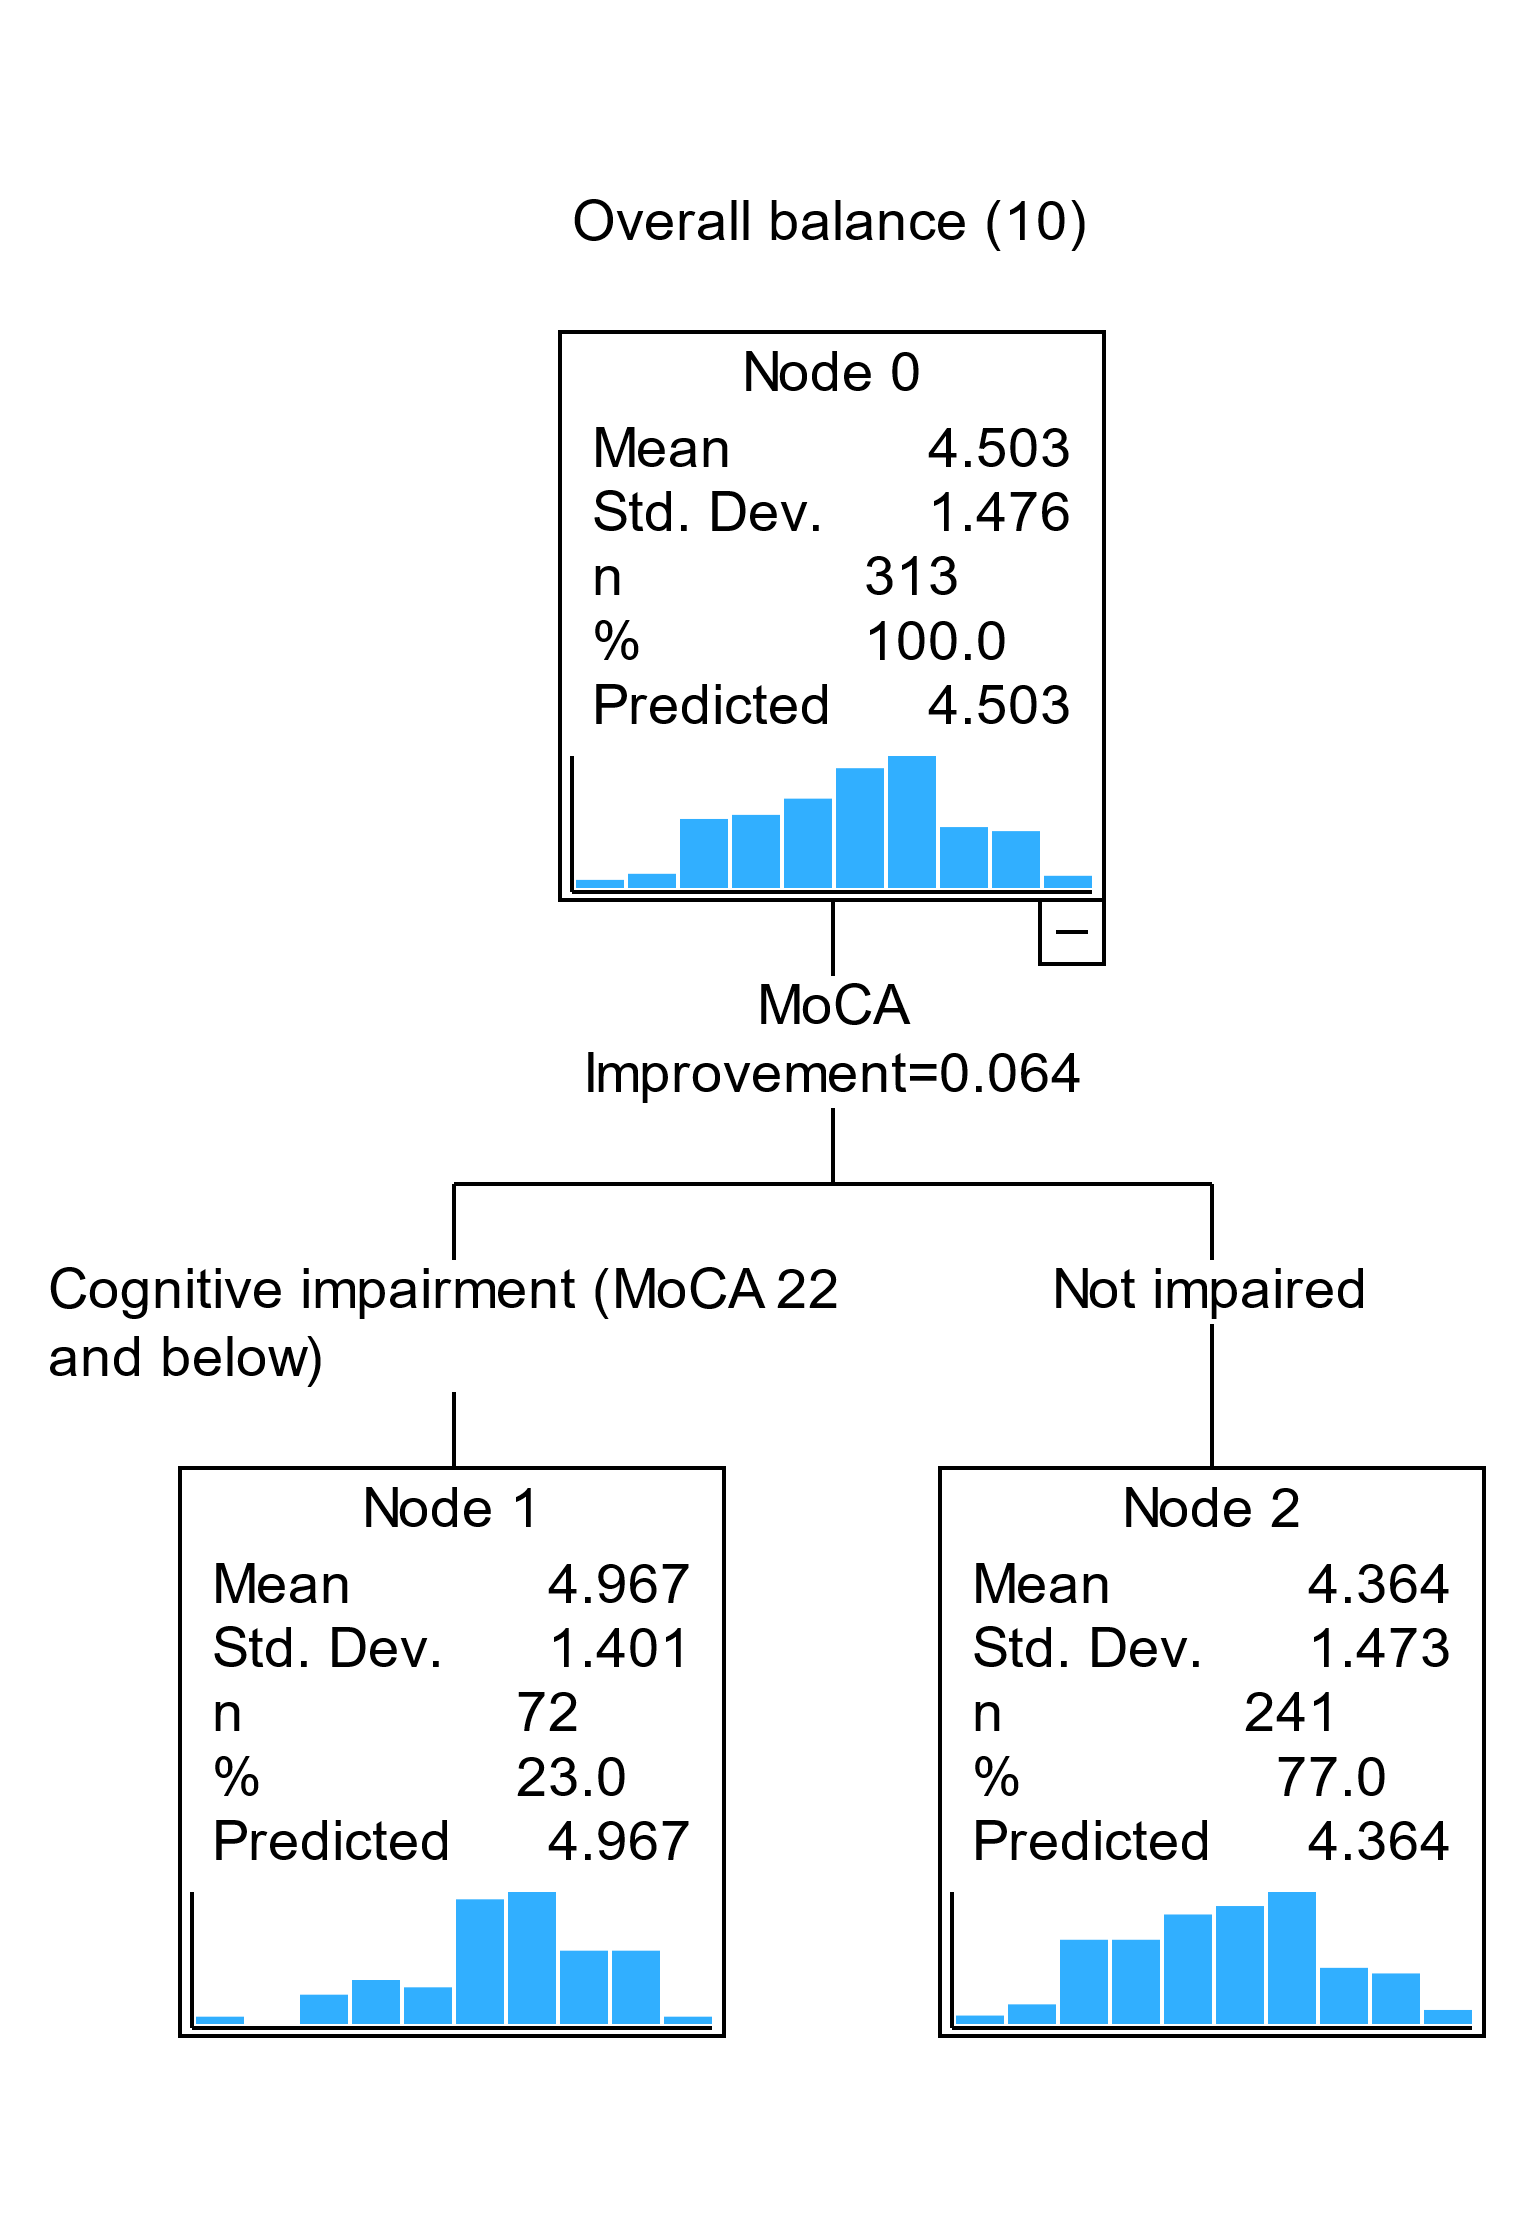 |

**Figure S3.** CART diagram of factors associated with DQI-I and subcomponents in pre-frail older adults for plausible reporter (PR) only.

| Low Energy Reporters only | | | | |
| --- | --- | --- | --- | --- |
| Total DQI-I  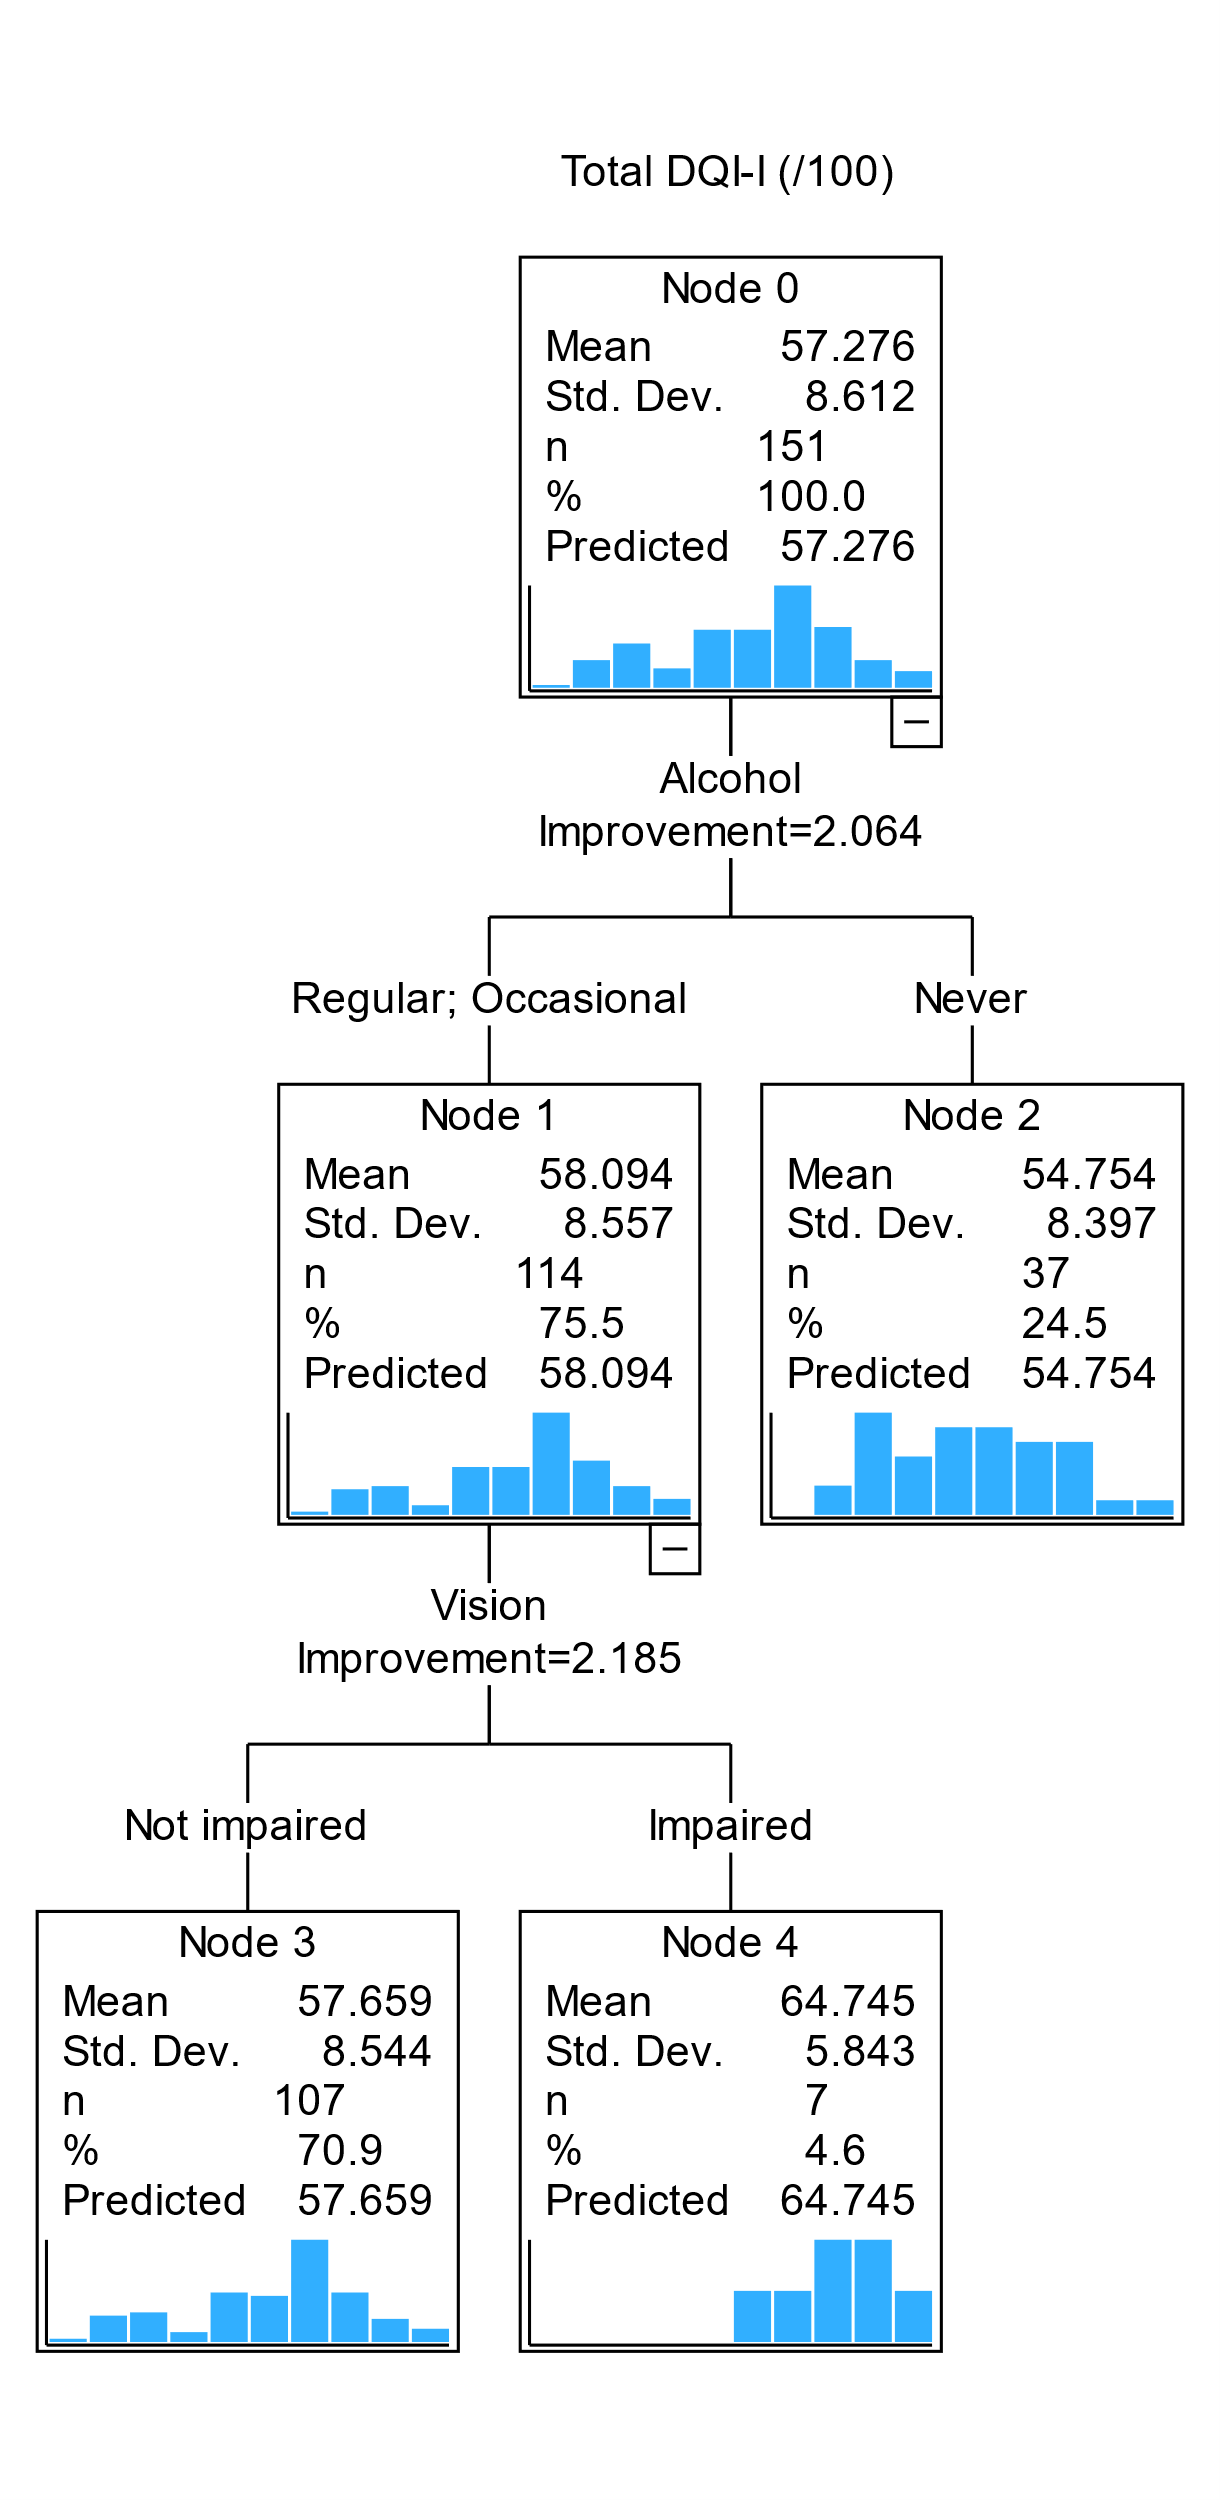 | Variety  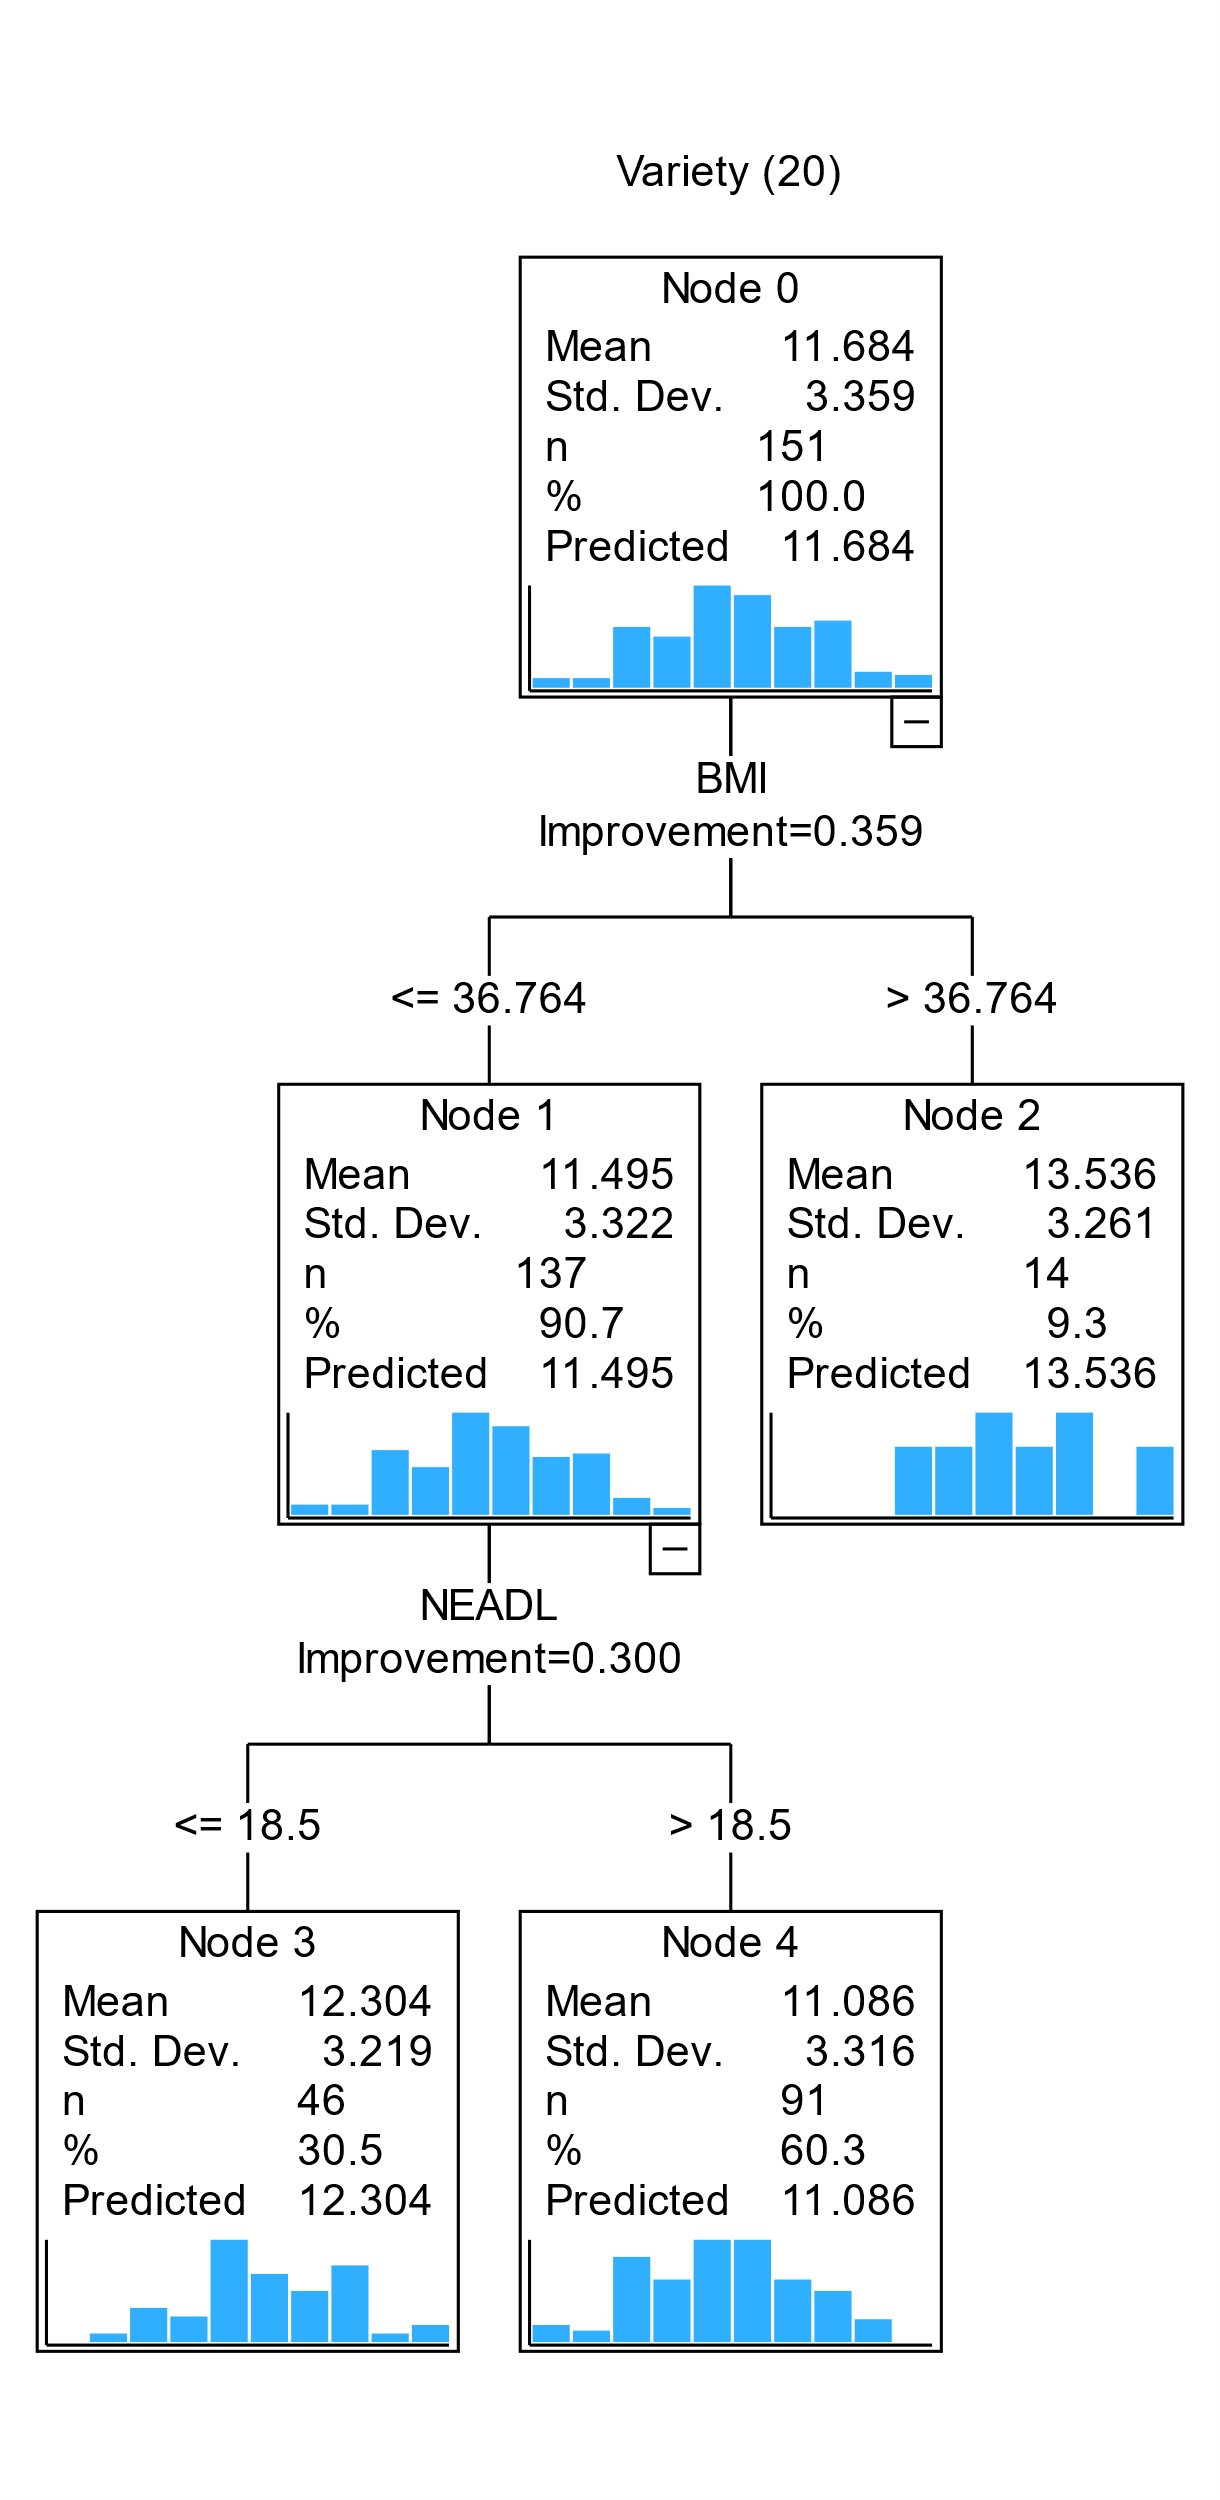 | Adequacy  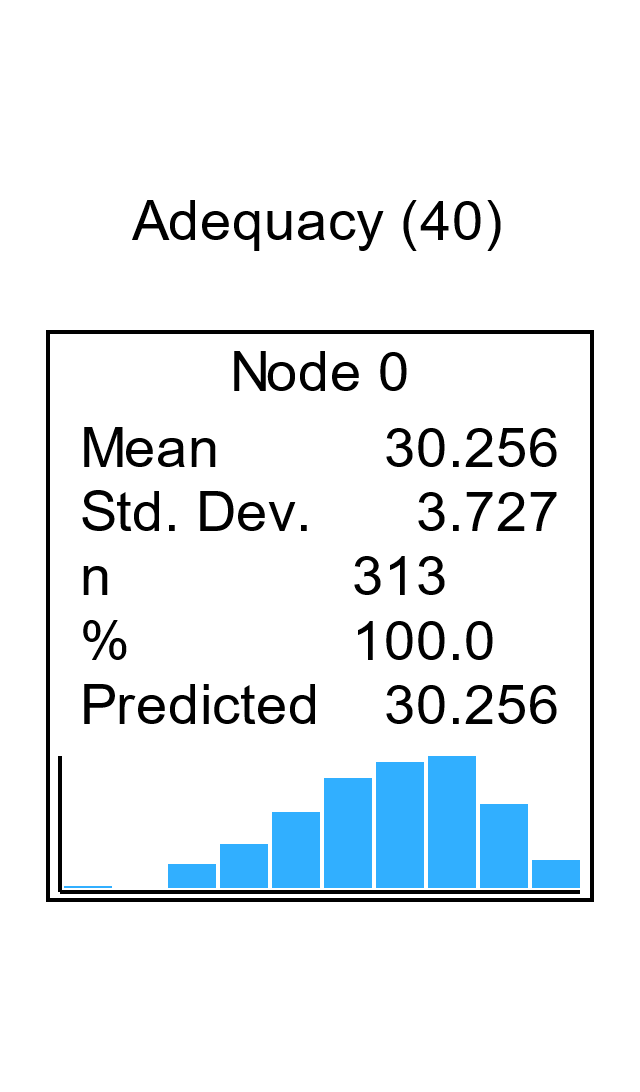 | Moderation  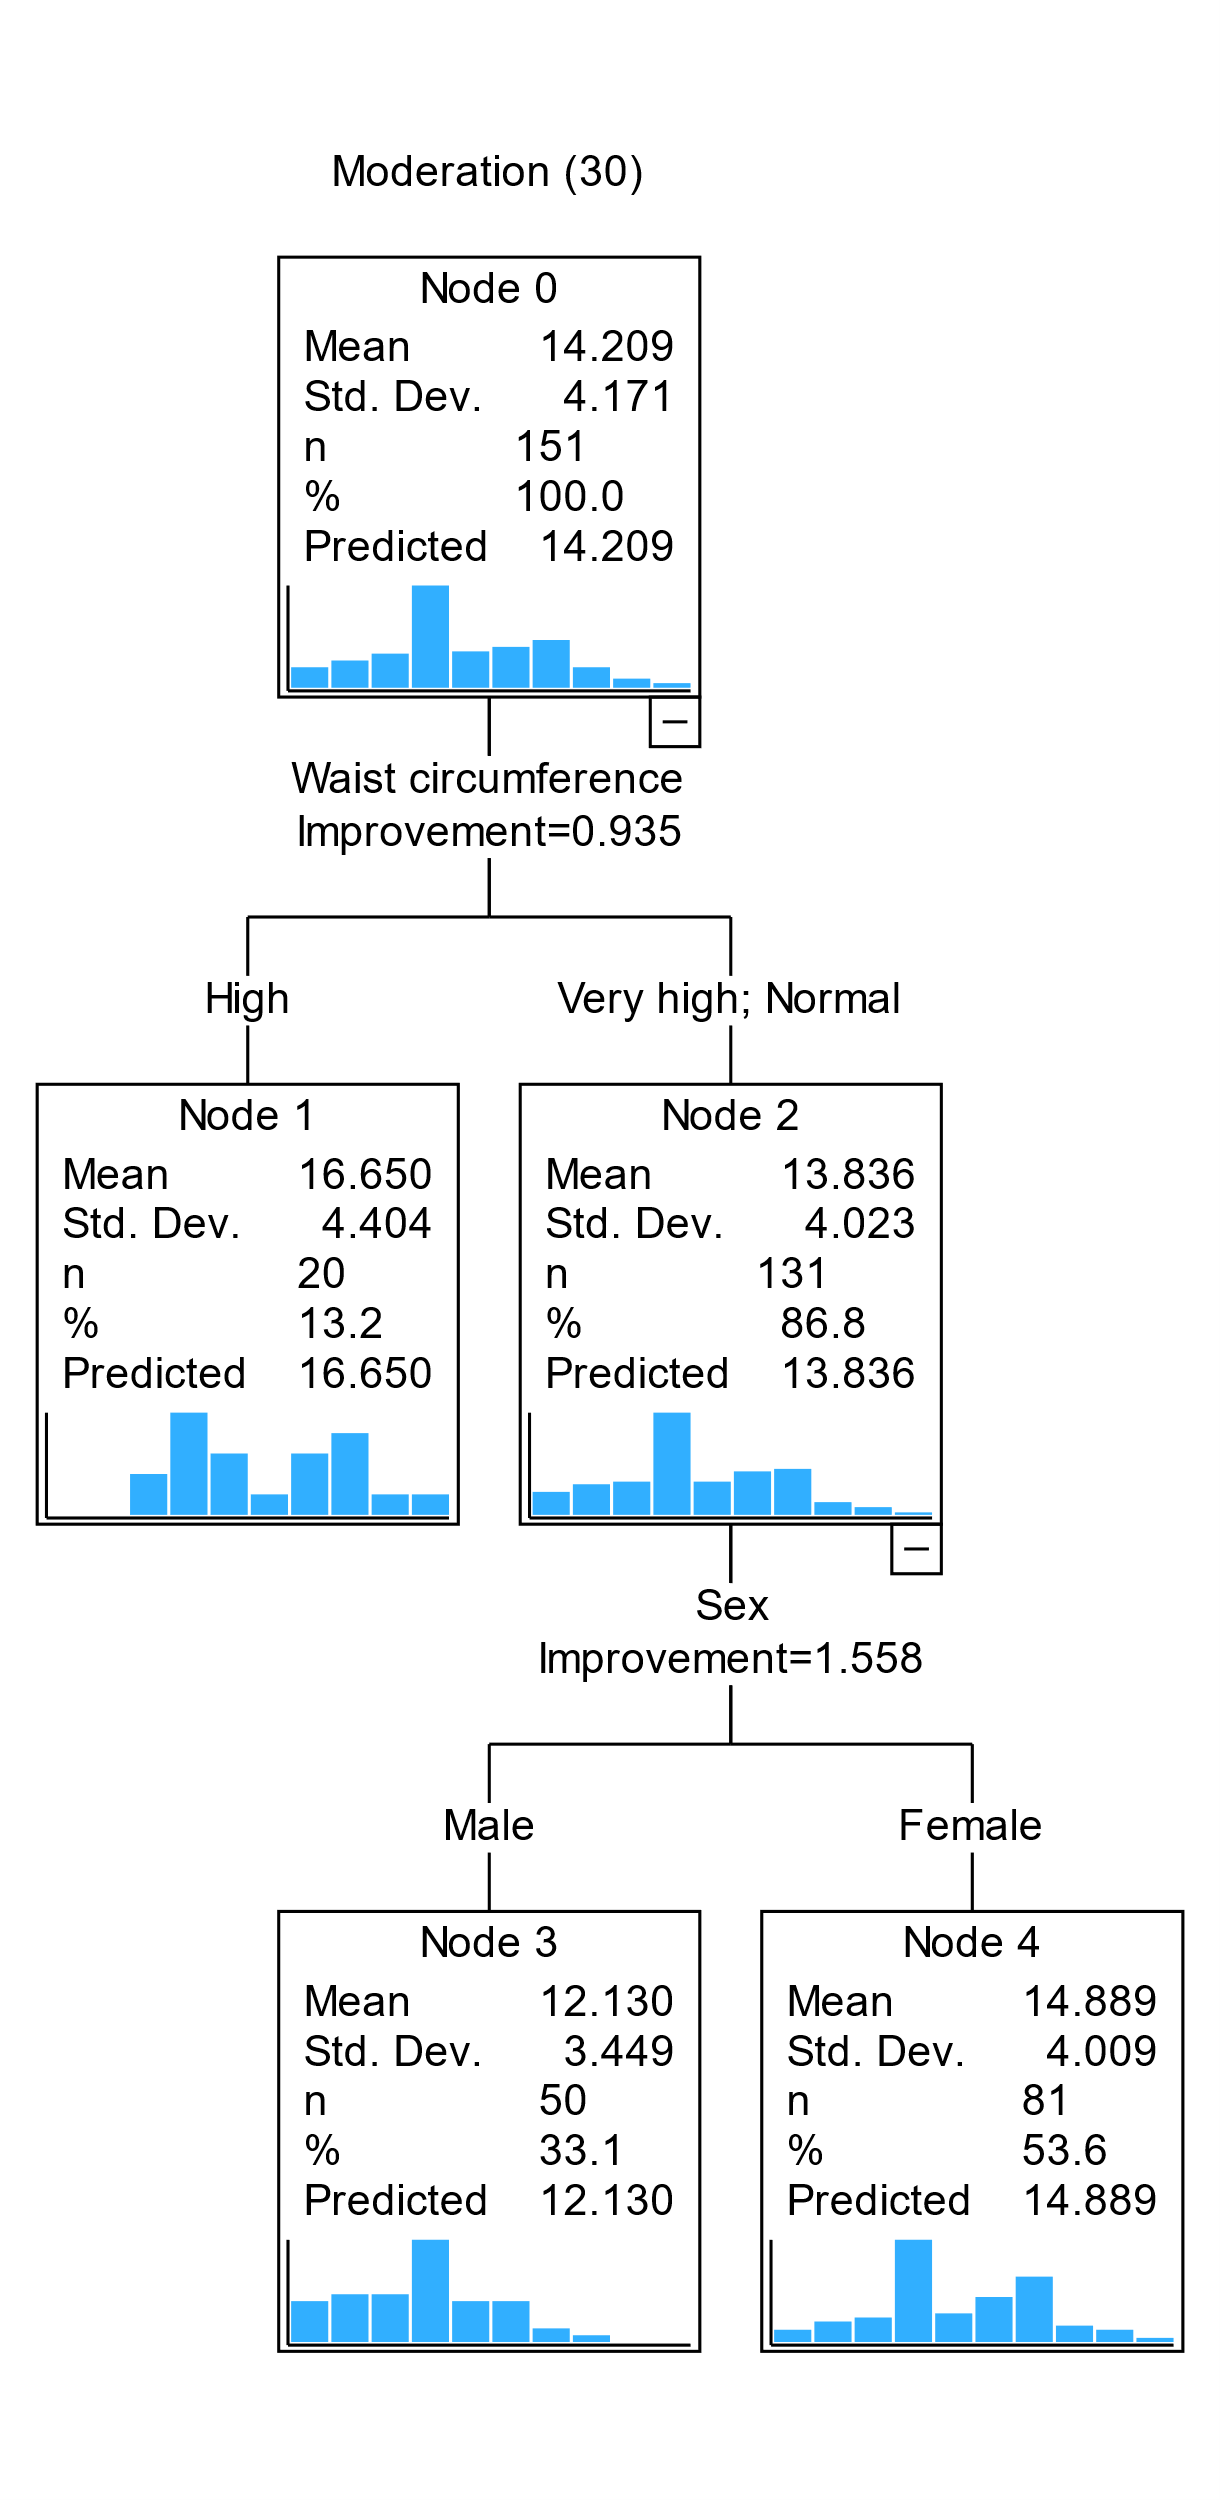 | Balance  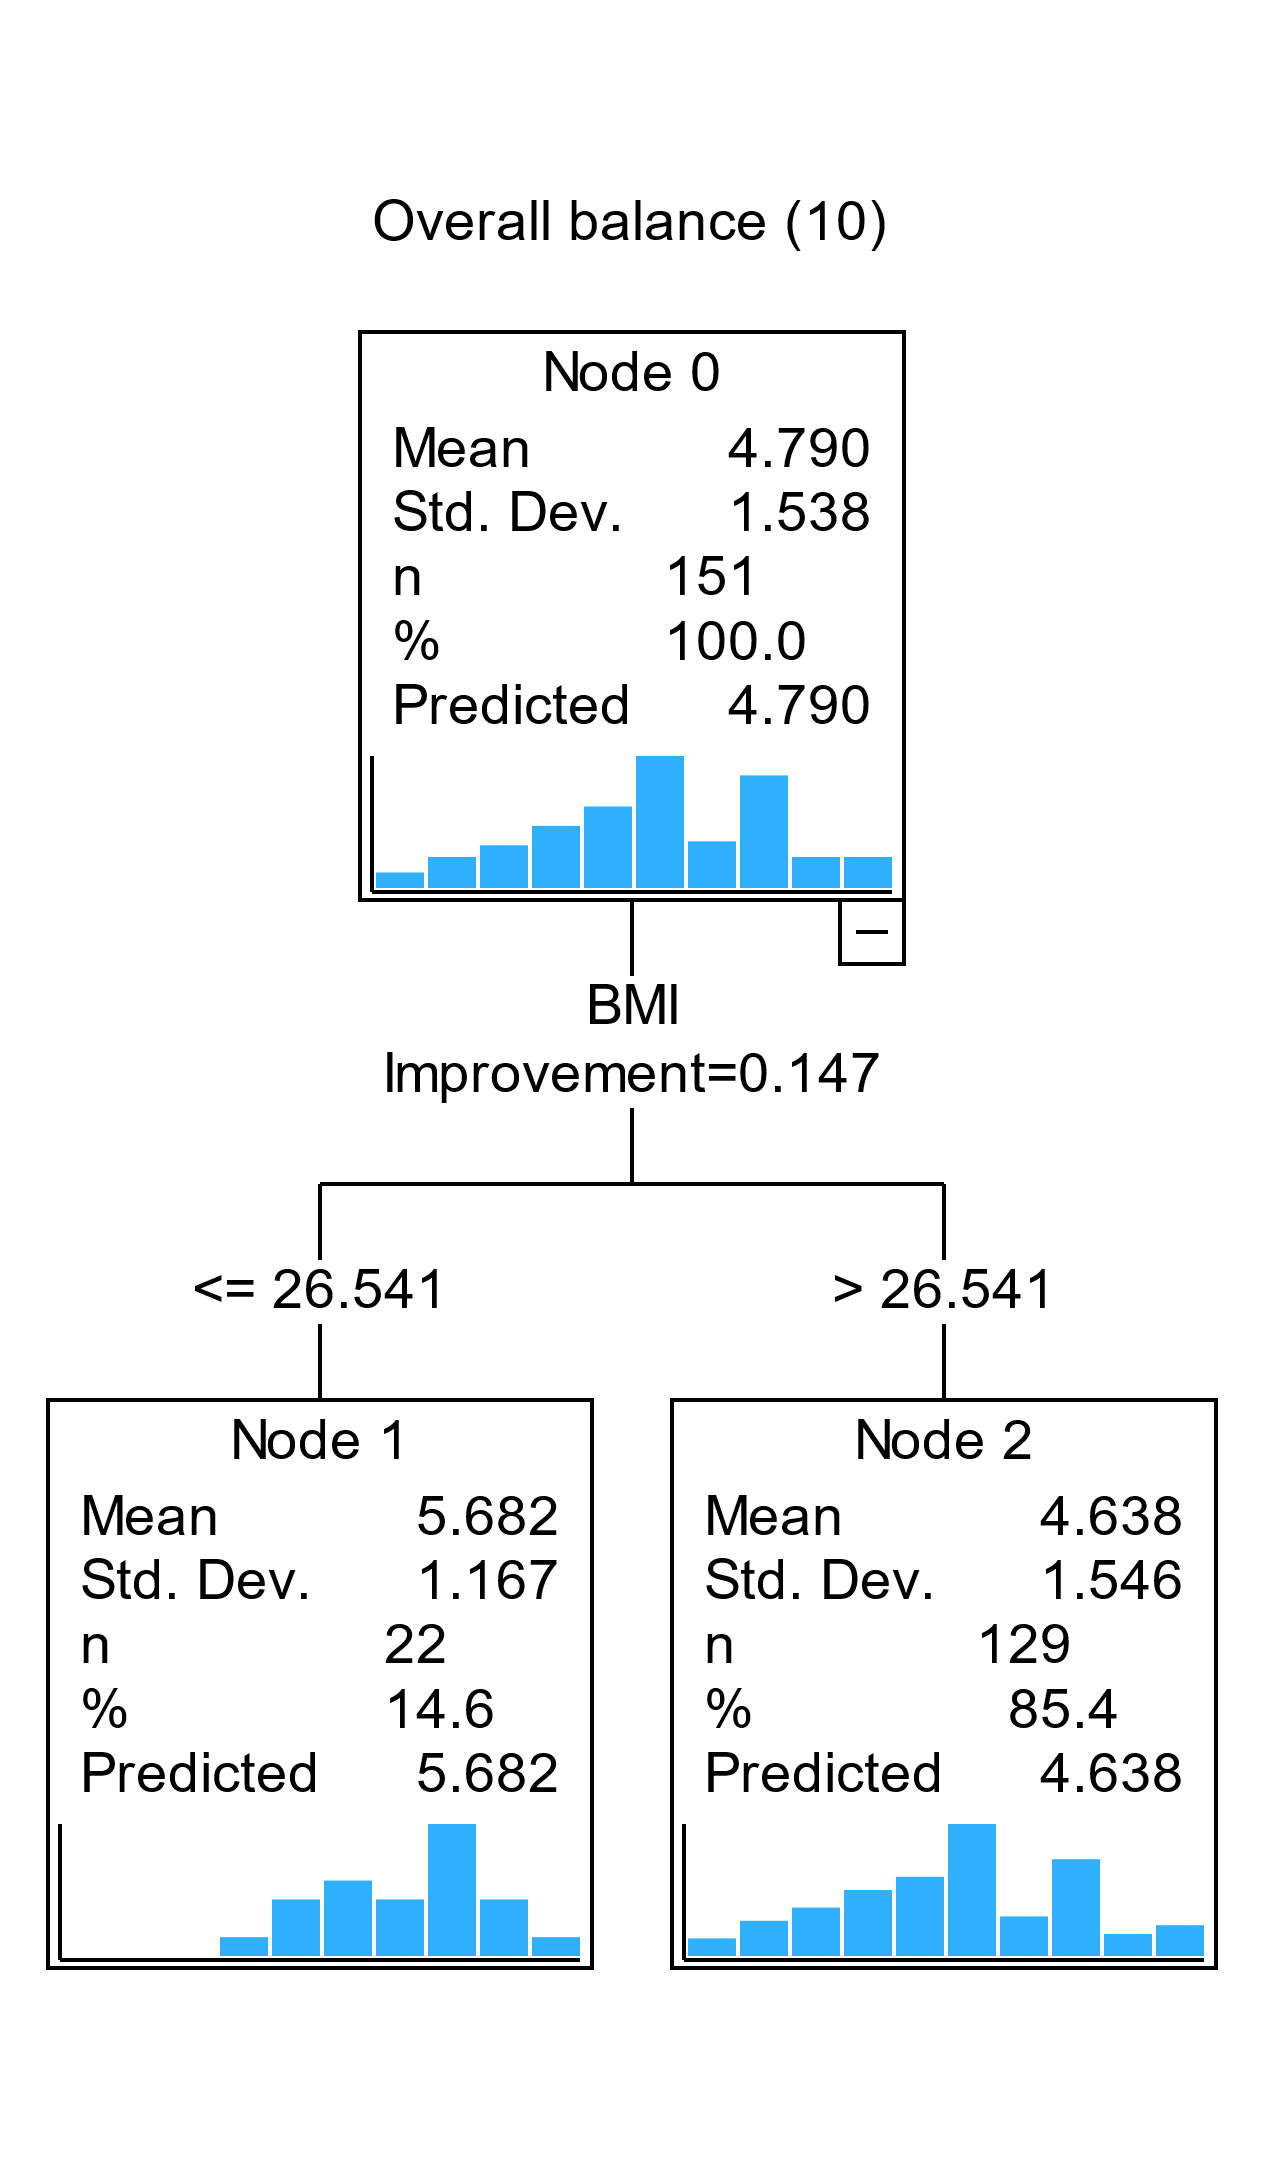 |

**Figure S4.** CART diagram of factors associated with DQI-I and subcomponents in pre-frail older adults for LER only.
